# Supplementary material for: Application of gas chromatography-mass spectrometry and chemometrics methods for assessing volatile profiles of Pu-erh tea with different processing methods and ageing years
Source: Royal Society of Chemistry journal article supplement (doi:10.1039/c5ra15381f), 2015-01-01
Supplement: c5ra15381f1.pdf [file c5ra15381f1.pdf]

Electronic supplementary information:

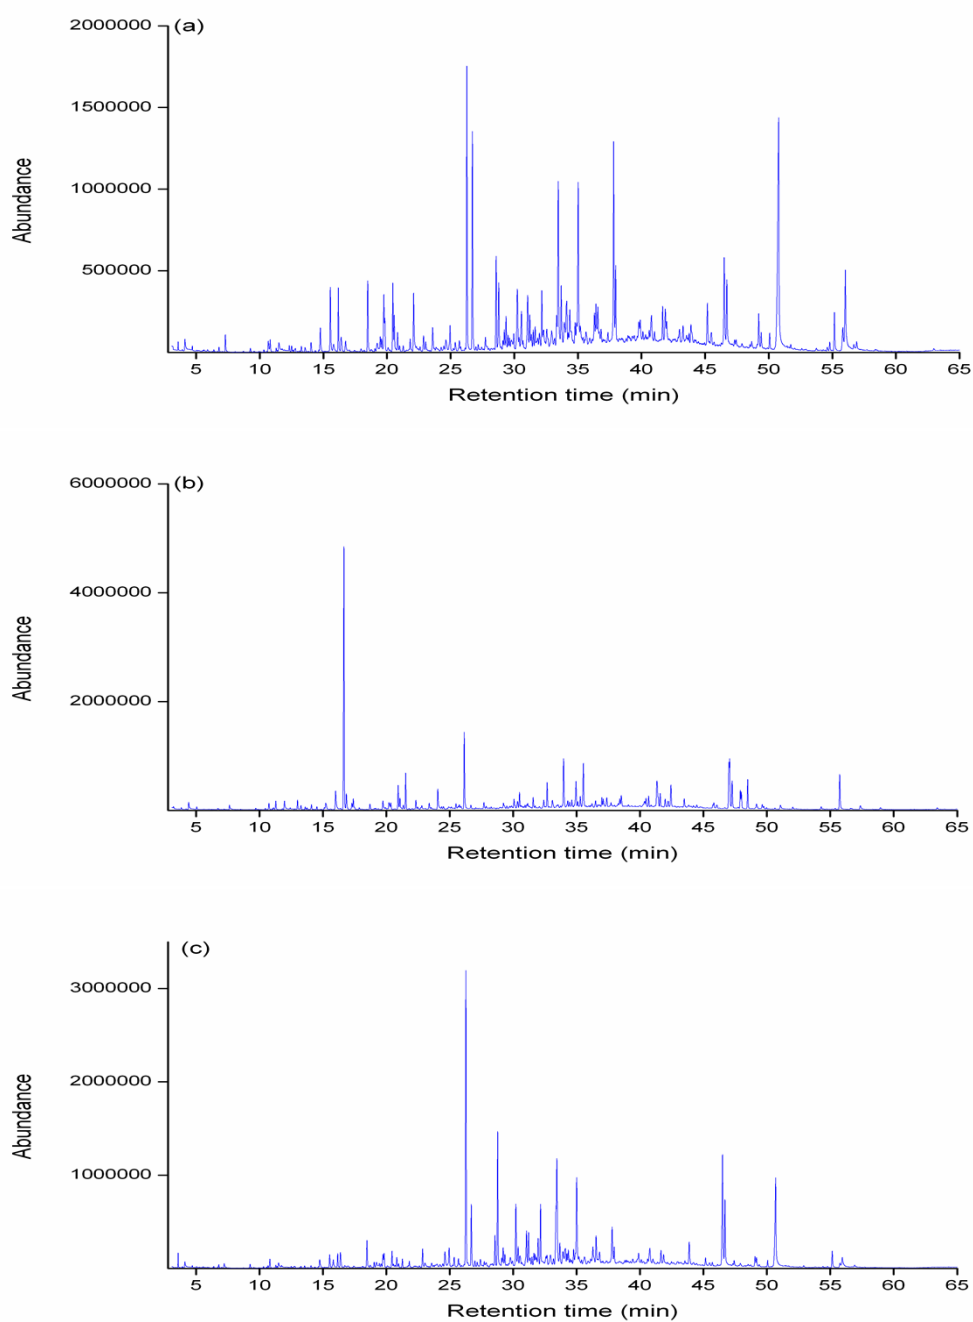

Figure S1 Total ion chromatograms of Pu-erh tea by HS-SPME/GC-MS (a aged tea, b raw tea, c ripe tea)

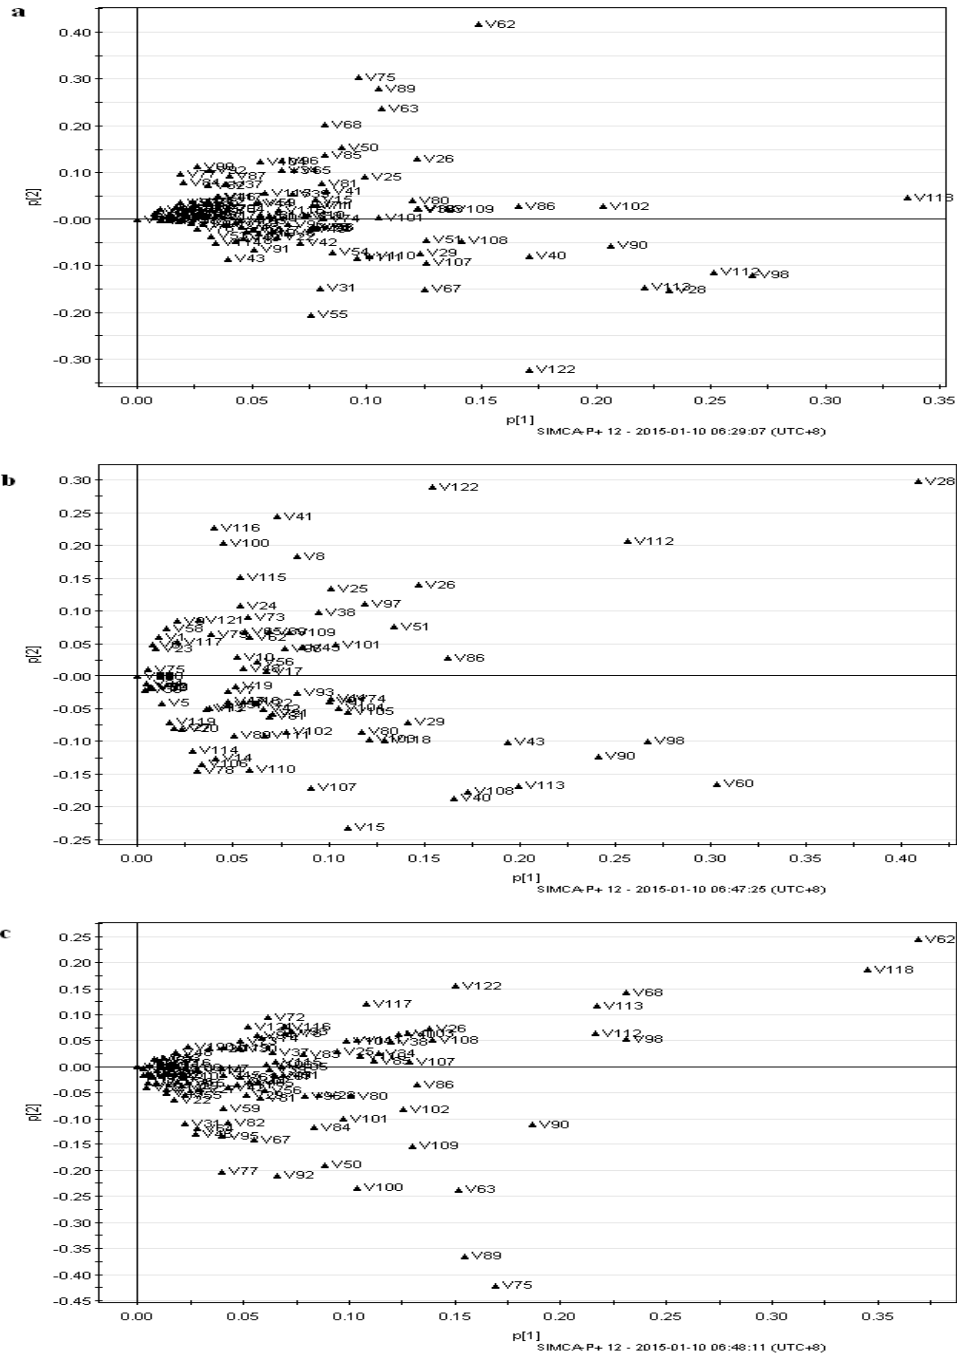

Figure S2 The loading plots of different years aged tea (a), raw tea (b) and ripe tea (c)
